# Supplementary material for: Plume spreading test case for coastal ocean models
Source: Copernicus journal article supplement (doi:10.5194/gmd-14-6945-2021), 2021-11-17
Supplement: Supplementary file 1 [file gmd-14-6945-2021-supplement.zip]

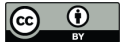

## *Supplement of*

# **Plume spreading test case for coastal ocean models**

**Vera Fofonova et al.**

*Correspondence to:* Vera Fofonova (vera.fofonova@awi.de)

- gmd-14-6945-2021-supplement-title-page.pdf
- Supplementary
  - Read\_me.docx
  - Table\_to\_fill\_for\_intercomparison.docx
  - quad\_mesh
    - \* PTquad\_depth.out
    - \* PTquad\_elem2d.out
    - \* PTquad\_nod2d.out
  - tri\_mesh
    - \* PTtri\_depth.out
    - \* PTtri\_elem2d.out
    - \* PTtri\_nod2d.out

The copyright of individual parts of the supplement might differ from the article licence.
